# Supplementary material for: Modulating between 2e− and 4e− pathways in the oxygen reduction reaction with laser-synthesized iron oxide-grafted nitrogen-doped carbon
Source: Royal Society of Chemistry journal article supplement (doi:10.1039/d2ta05838c), 2022-01-01
Supplement: d2ta05838c1.pdf [file d2ta05838c1.pdf]

**Supporting Information to**

**Modulating between 2e<sup>-</sup> and 4e<sup>-</sup> pathway in the oxygen  
reduction reaction with laser-synthesized iron oxide-grafted  
nitrogen-doped carbon**

Huize Wang, Maria Jerigova, Jing Hou, Nadezda V. Tarakina, Simon Delacroix, Nieves Lopez-Salas, Volker Strauss

|                                                   |            |
|---------------------------------------------------|------------|
| <b>Chemical composition .....</b>                 | <b>S2</b>  |
| <b>Electrical properties .....</b>                | <b>S3</b>  |
| <b>Pre-Carbonization .....</b>                    | <b>S3</b>  |
| <b>X-ray photoelectron spectroscopy.....</b>      | <b>S5</b>  |
| <b>STEM and EDX analysis .....</b>                | <b>S11</b> |
| <b>Oxygen reduction reaction performance.....</b> | <b>S12</b> |
| <b>Comparison with published studies .....</b>    | <b>S14</b> |
| <b>References.....</b>                            | <b>S15</b> |

## Chemical composition

**Table S1.** Elemental mass percentage of *pre-NC(Fe)\_1(x)* and *LP-NC(Fe)\_n(x)* obtained from combustion elemental analysis (N,C,H) and ICP-MS (Fe).\*

| sample                   | N  | C  | H | Fe   |
|--------------------------|----|----|---|------|
| CNFA (CA/U300)           | 13 | 68 | 1 | -    |
| <b>pre-NC(Fe)_1(2.3)</b> | 21 | 48 | 3 | 2.3  |
| <b>pre-NC(Fe)_1(2.7)</b> | 19 | 42 | 3 | 2.7  |
| <b>pre-NC(Fe)_1(8.6)</b> | 21 | 42 | 3 | 8.6  |
| <b>LP-NC(Fe)_1(3.0)</b>  | 10 | 72 | 1 | 3.0  |
| <b>LP-NC(Fe)_1(4.6)</b>  | 7  | 72 | 1 | 4.6  |
| <b>LP-NC(Fe)_1(12.1)</b> | 6  | 60 | 1 | 12.1 |
| <b>LP-NC(Fe)_2(3.3)</b>  | 13 | 60 | 2 | 3.3  |
| <b>LP-NC(Fe)_2(3.8)</b>  | 11 | 67 | 2 | 3.8  |
| <b>LP-NC(Fe)_2(14.5)</b> | 8  | 60 | 1 | 14.5 |

\* The remaining mass is due oxygen.

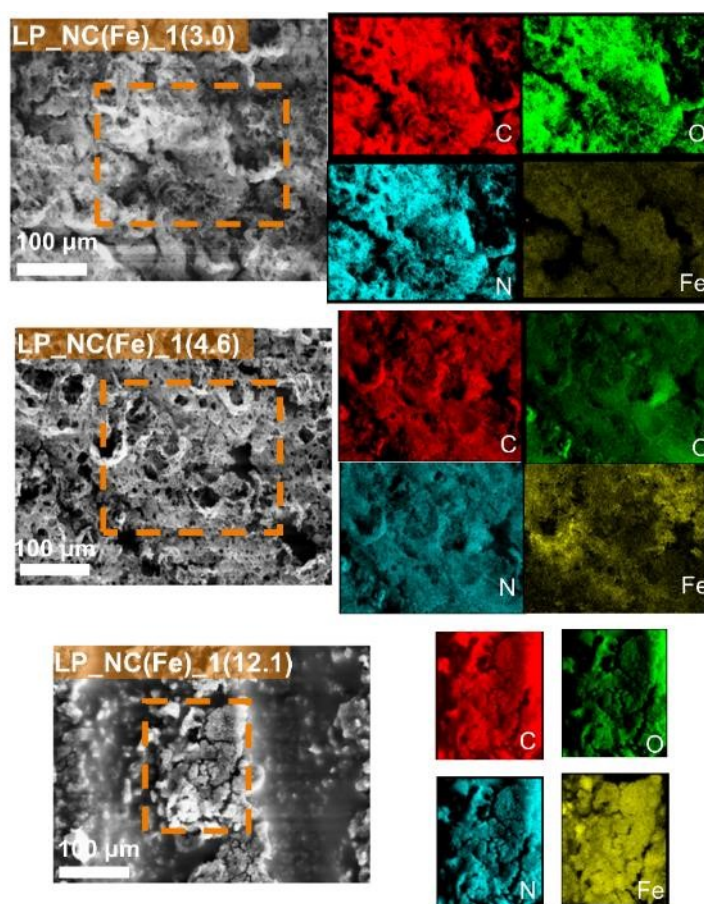

**Figure S1.** EDX mapping of *LP\_NC(Fe)\_1(3.0)*, *LP\_NC(Fe)\_1(4.6)* and *LP\_NC(Fe)\_1(12.1)*.

## Electrical properties

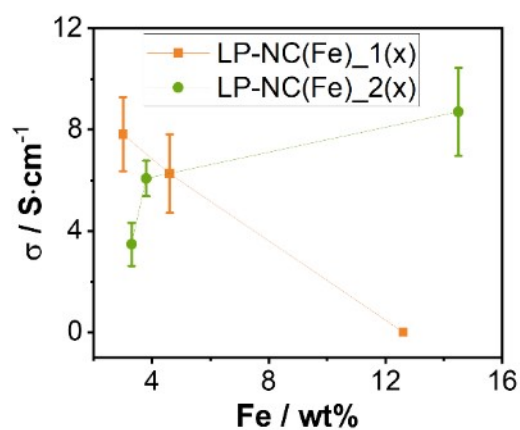

**Figure S2.** Electrical conductivity of films LP-NC(Fe)\_1(x) and LP-NC(Fe)\_2(x) obtained by averaging 30 sample films.

## Pre-Carbonization

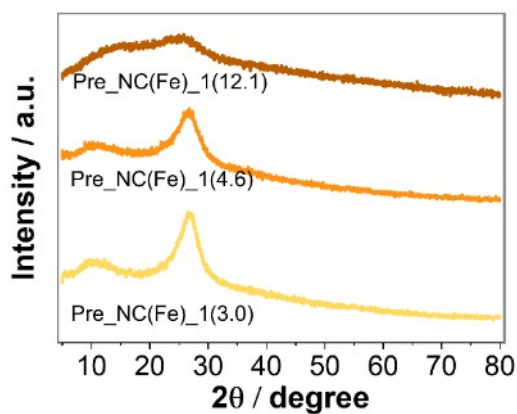

**Figure S3.** X-ray powder diffraction patterns of the primary films to route 1 (pre-NC(Fe)\_1(y)), pre-carbonized at 300 °C.

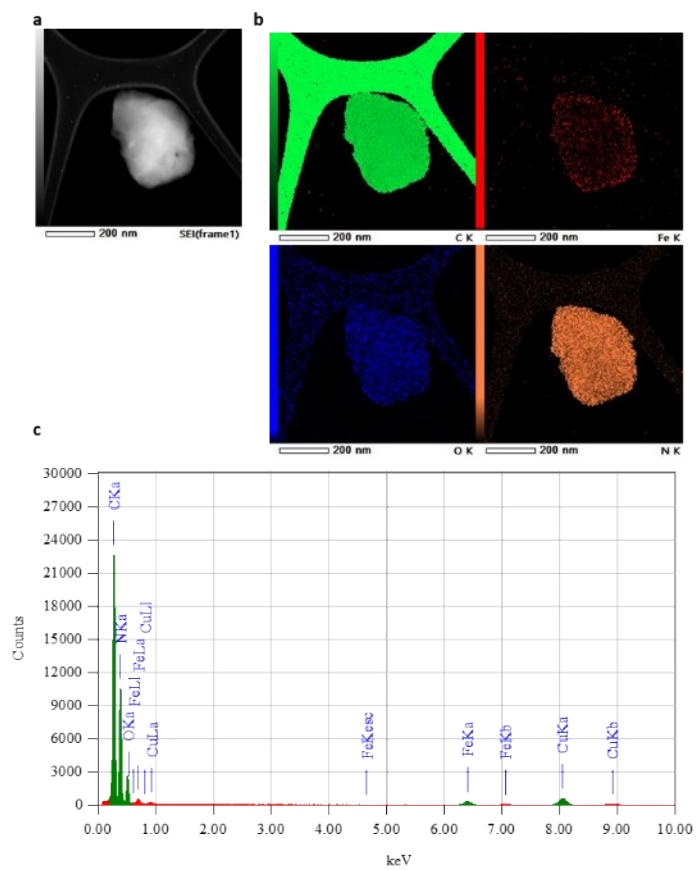

**Figure S4.** (a) STEM-ADF images of *pre\_NC(Fe)\_1(3.0)*; (b) corresponding EDX elemental mappings and spectrum from (a).

## X-ray photoelectron spectroscopy

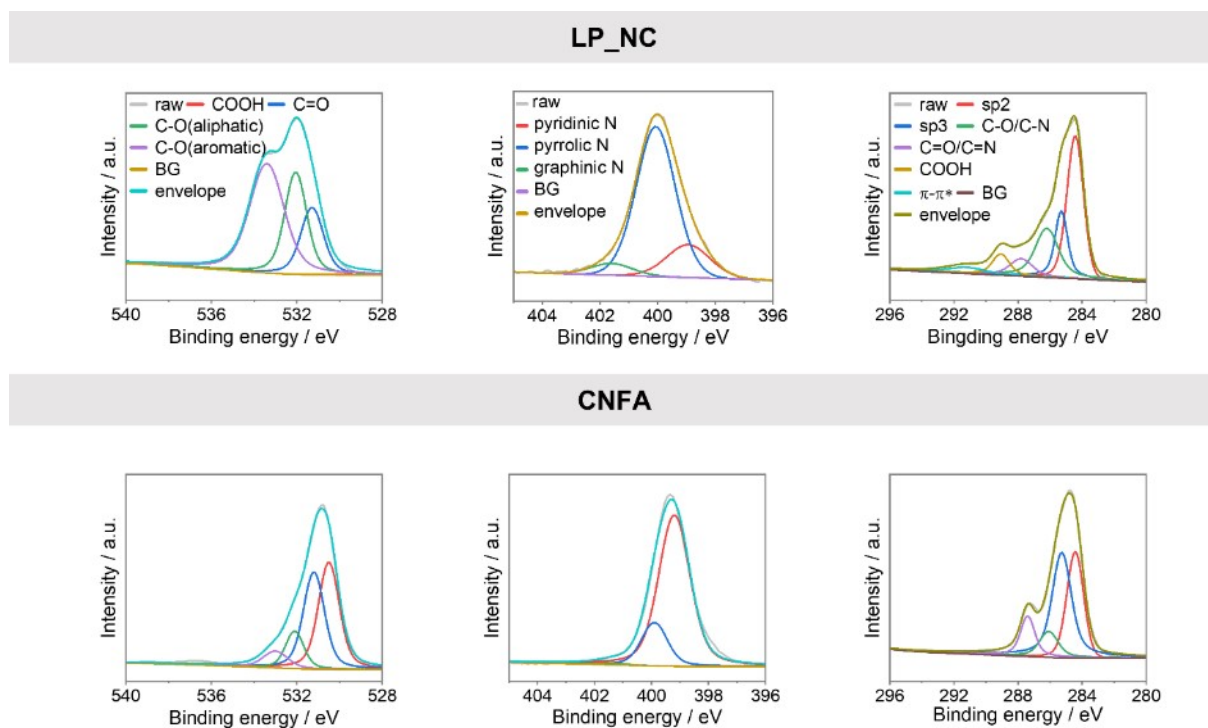

**Figure S5.** XPS spectra of *LP\_NC* (reference) and the *CNFA* (CA/U(300)) with emphasis on the  $O_{1s}$  (left),  $N_{1s}$  (middle), and  $C_{1s}$  regions (right).

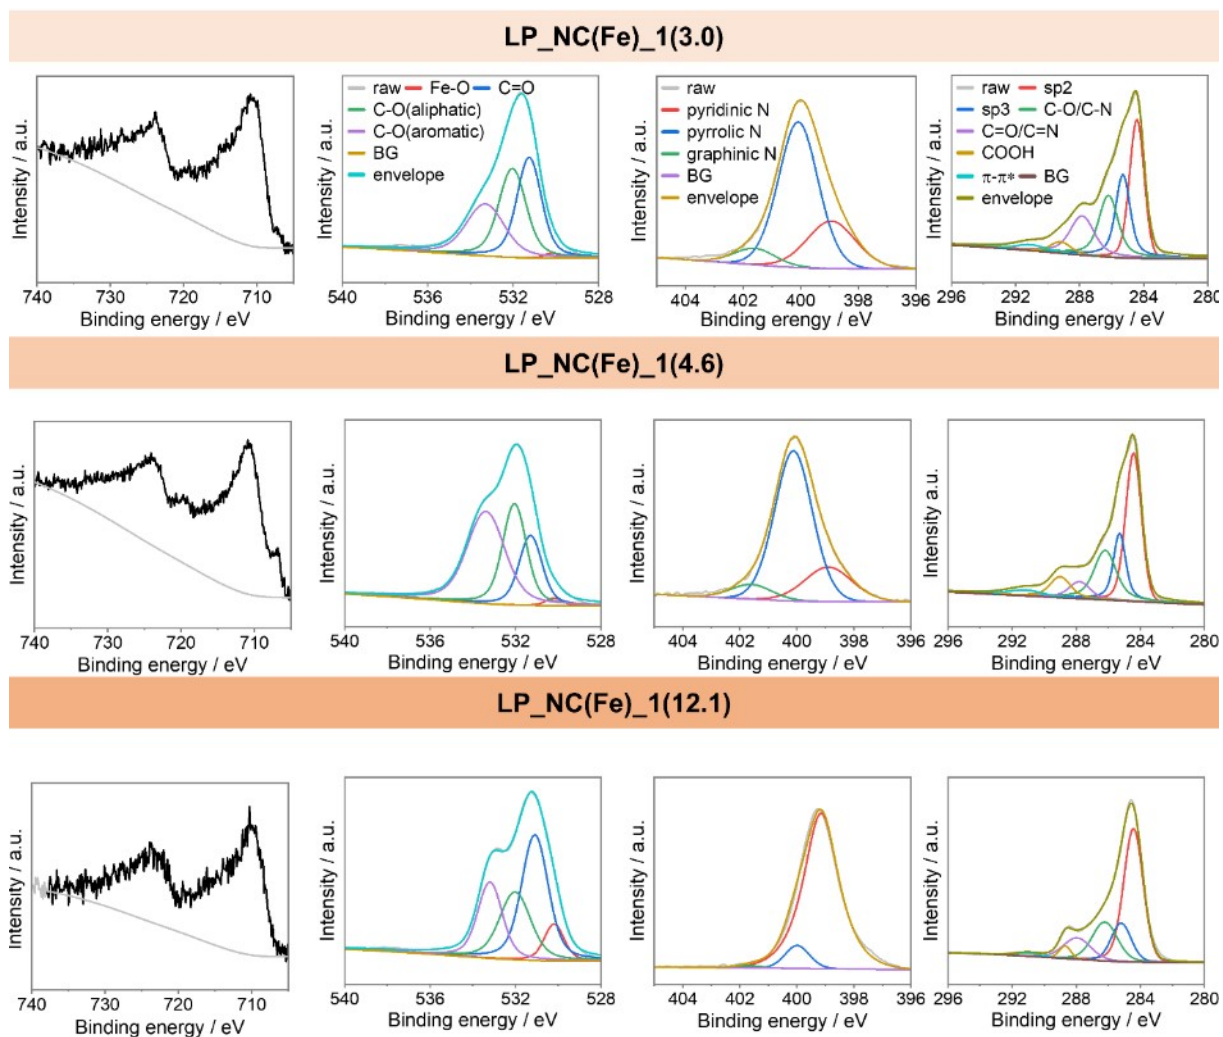

**Figure S6.** XPS spectra of the samples prepared by route 1: *LP\_NC(Fe)<sub>1</sub>(3.0)*, *LP\_NC(Fe)<sub>1</sub>(4.6)* and *LP\_NC(Fe)<sub>1</sub>(12.1)* with emphasis on the  $F_{2p}$ ,  $O_{1s}$ ,  $N_{1s}$ , and  $C_{1s}$  (from left to right) regions.

### Pre\_NC(Fe)\_1(3.0)

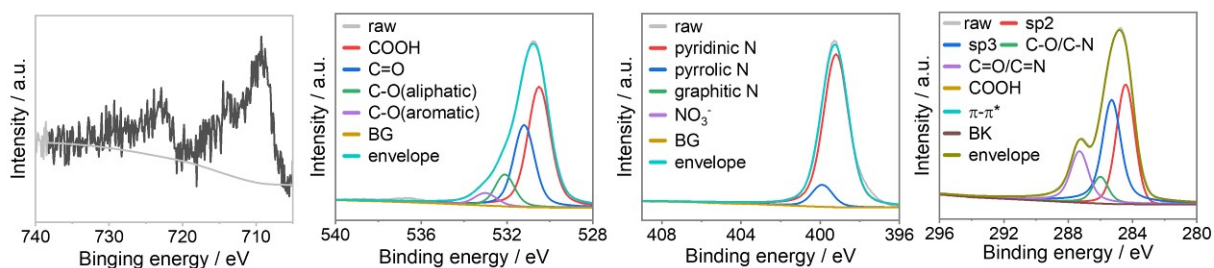

### Pre\_NC(Fe)\_1(4.6)

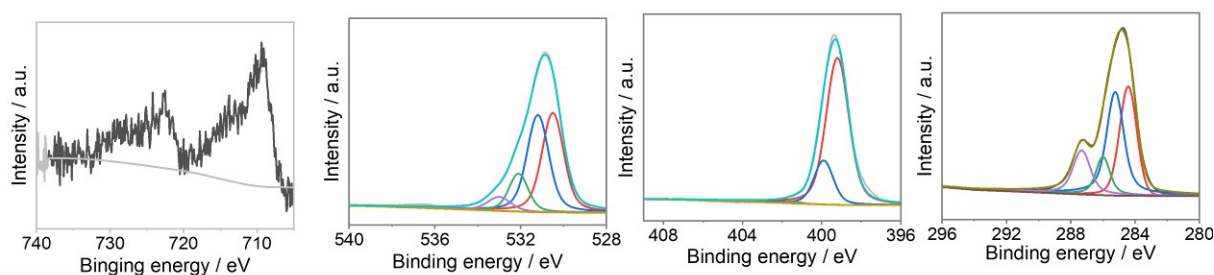

### Pre\_NC(Fe)\_1(12.1)

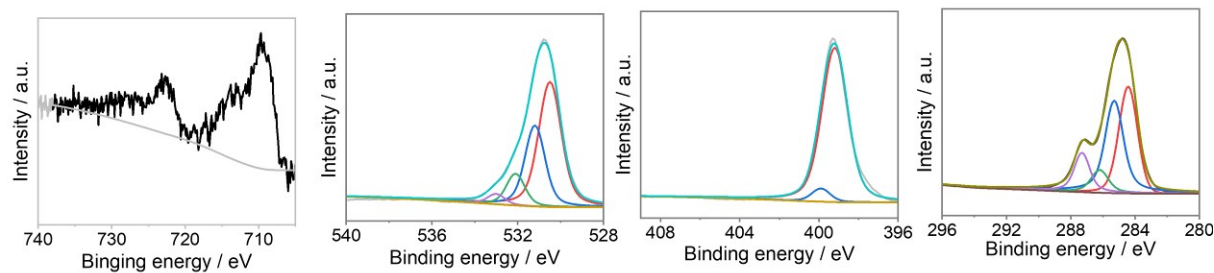

**Figure S7.** XPS spectra of the primary films of route 1: *pre\_NC(Fe)\_1(3.0)*, *pre\_NC(Fe)\_1(4.6)* and *pre\_NC(Fe)\_1(12.1)* with emphasis on the  $F_{2p}$ ,  $O_{1s}$ ,  $N_{1s}$ , and  $C_{1s}$  (from left to right) regions.

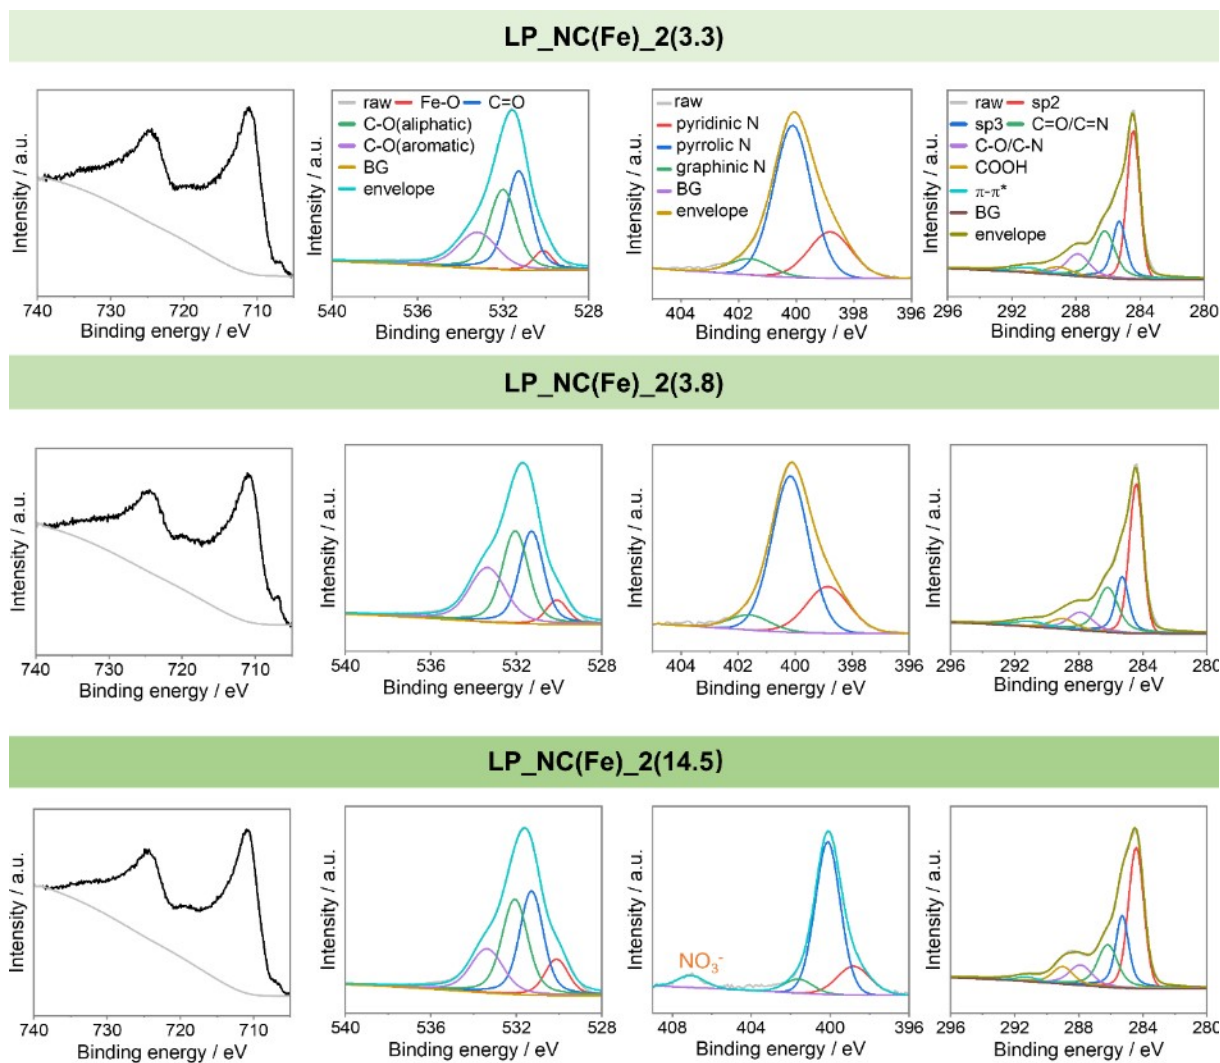

**Figure S8.** XPS spectra of the samples prepared by route 2: **LP\_NC(Fe)\_2(3.3)**, **LP\_NC(Fe)\_2(3.8)** and **LP\_NC(Fe)\_2(14.5)** with emphasis on the  $F_{2p}$ ,  $O_{1s}$ ,  $N_{1s}$ , and  $C_{1s}$  (from left to right) regions.



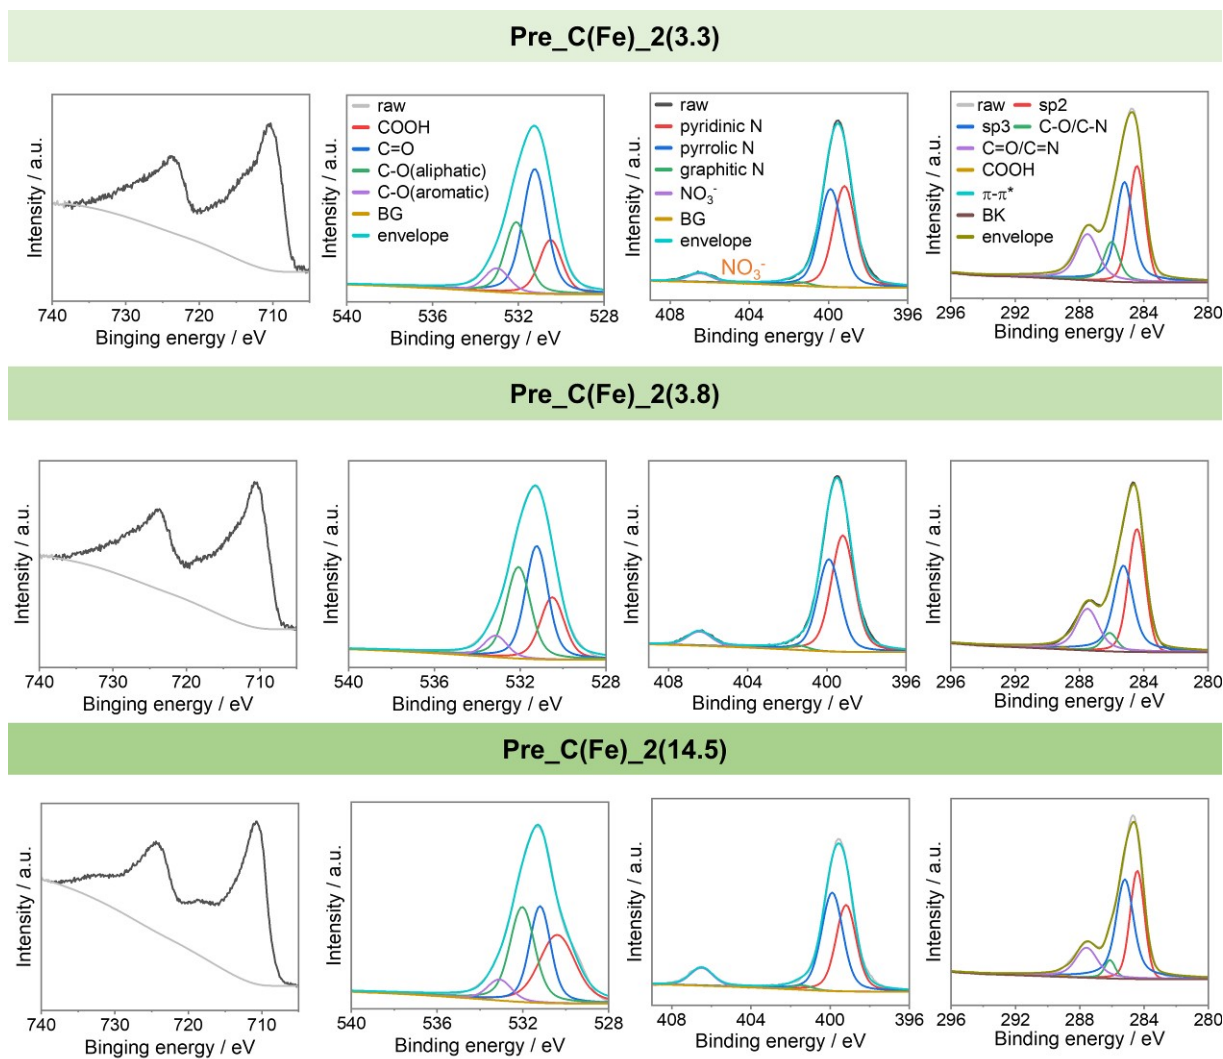

**Figure S9.** XPS spectra of the primary films of route 2: *pre\_NC(Fe)<sub>2</sub>(3.3)*, *pre\_NC(Fe)<sub>2</sub>(3.8)* and *pre\_NC(Fe)<sub>2</sub>(14.5)* with emphasis on the F<sub>2p</sub>, O<sub>1s</sub>, N<sub>1s</sub>, and C<sub>1s</sub> (from left to right) regions.

**Table S2.** Elemental mass percentage of pre-NC(Fe)\_1(x) and LP-NC(Fe)\_n(x) obtained from XPS survey spectra quantification

| Sample            | N     | C     | O     | Fe    |
|-------------------|-------|-------|-------|-------|
| LP-NC             | 5.05  | 77.54 | 17.41 | -     |
| pre-NC(Fe)_1(2.3) | 13.63 | 69.21 | 17.08 | 0.09  |
| pre-NC(Fe)_1(2.7) | 12.06 | 71.03 | 16.78 | 0.13  |
| pre-NC(Fe)_1(8.6) | 12.92 | 70.63 | 16.10 | 0.35  |
| LP-NC(Fe)_1(3.0)  | 9.77  | 77.24 | 12.82 | 0.74  |
| LP-NC(Fe)_1(4.6)  | 4.11  | 75.42 | 15.53 | 0.96  |
| LP-NC(Fe)_1(12.1) | 6.33  | 74.58 | 18.96 | 0.56  |
| LP-NC(Fe)_2(3.3)  | 7.05  | 72.43 | 14.74 | 5.78  |
| LP-NC(Fe)_2(3.8)  | 5.25  | 73.02 | 16.48 | 5.25  |
| LP-NC(Fe)_2(14.5) | 3.02  | 61.29 | 23.92 | 11.77 |

**Table S3.** Composition of nitrogen of laser-carbon obtained by deconvolution of the  $N_{1s}$  peaks of the XPS spectra

| Sample            | $N_{1s}$ peaks (% of total peak area) |            |             |          | $H_2O_2$ production |
|-------------------|---------------------------------------|------------|-------------|----------|---------------------|
|                   | Pyridinic N                           | Pyrrolic N | Graphitic N | $NO_3^-$ |                     |
| LP-NC             | 18.36                                 | 75.34      | 6.29        | -        | 60                  |
| LP-NC(Fe)_1(3.0)  | 26.21                                 | 65.98      | 7.80        | -        | 40                  |
| LP-NC(Fe)_1(4.6)  | 20.71                                 | 71.61      | 7.68        | -        |                     |
| LP-NC(Fe)_1(12.1) | 90.83                                 | 8.44       | 0.73        | -        | 2                   |
| LP-NC(Fe)_2(3.3)  | 25.37                                 | 67.50      | 6.93        | -        | 80                  |
| LP-NC(Fe)_2(3.8)  | 21.22                                 | 68.09      | 10.70       | -        |                     |
| LP-NC(Fe)_2(14.5) | 42.01                                 | 50.49      | 2.12        | 5.37     | 8                   |

## STEM and EDX analysis

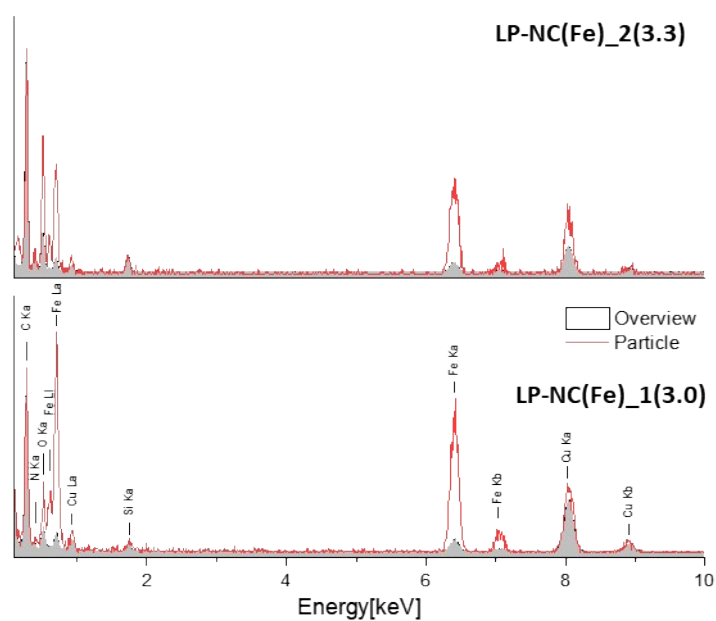

**Figure S10.** EDX spectrum on overview (grey filling) and particle (red line) regions of LP\_NC(Fe)<sub>1</sub>(3.0) (bottom) and LP\_NC(Fe)<sub>2</sub>(3.3) (top).

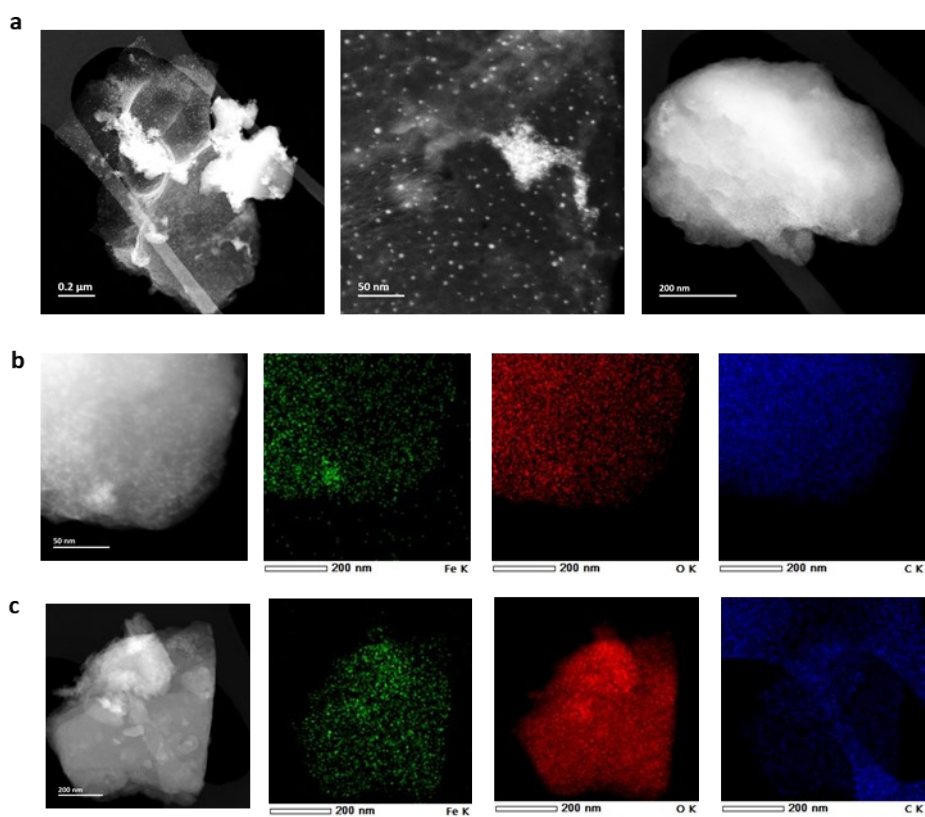

**Figure S11.** (a) STEM image of thin film, clusters, and dense substrate (from left to right) from LP\_NC(Fe)<sub>2</sub>(3.3); (b) EDX of dense carbon substrate grafted with iron clusters; (c) EDX with solid flake containing iron and oxide.

## Oxygen reduction reaction performance

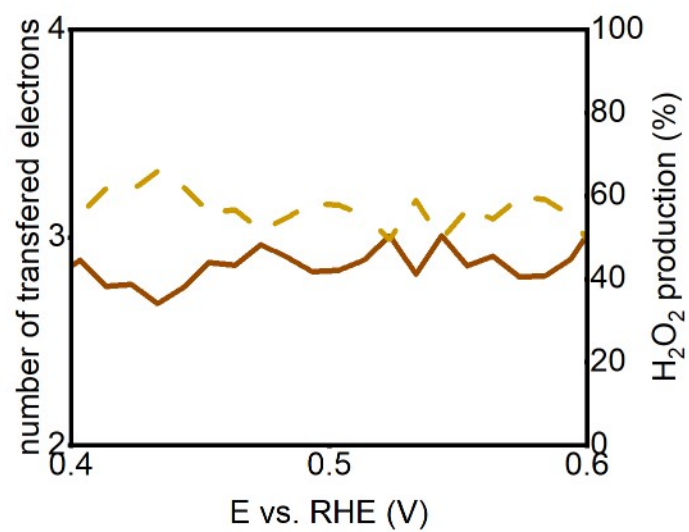

**Figure S12.** Calculated number of transferred electrons and H<sub>2</sub>O<sub>2</sub> production efficiency of LP-C(Fe)<sub>2</sub>(3.8) in KOH 0.1M. H<sub>2</sub>O<sub>2</sub> production (%) in dashed lines.

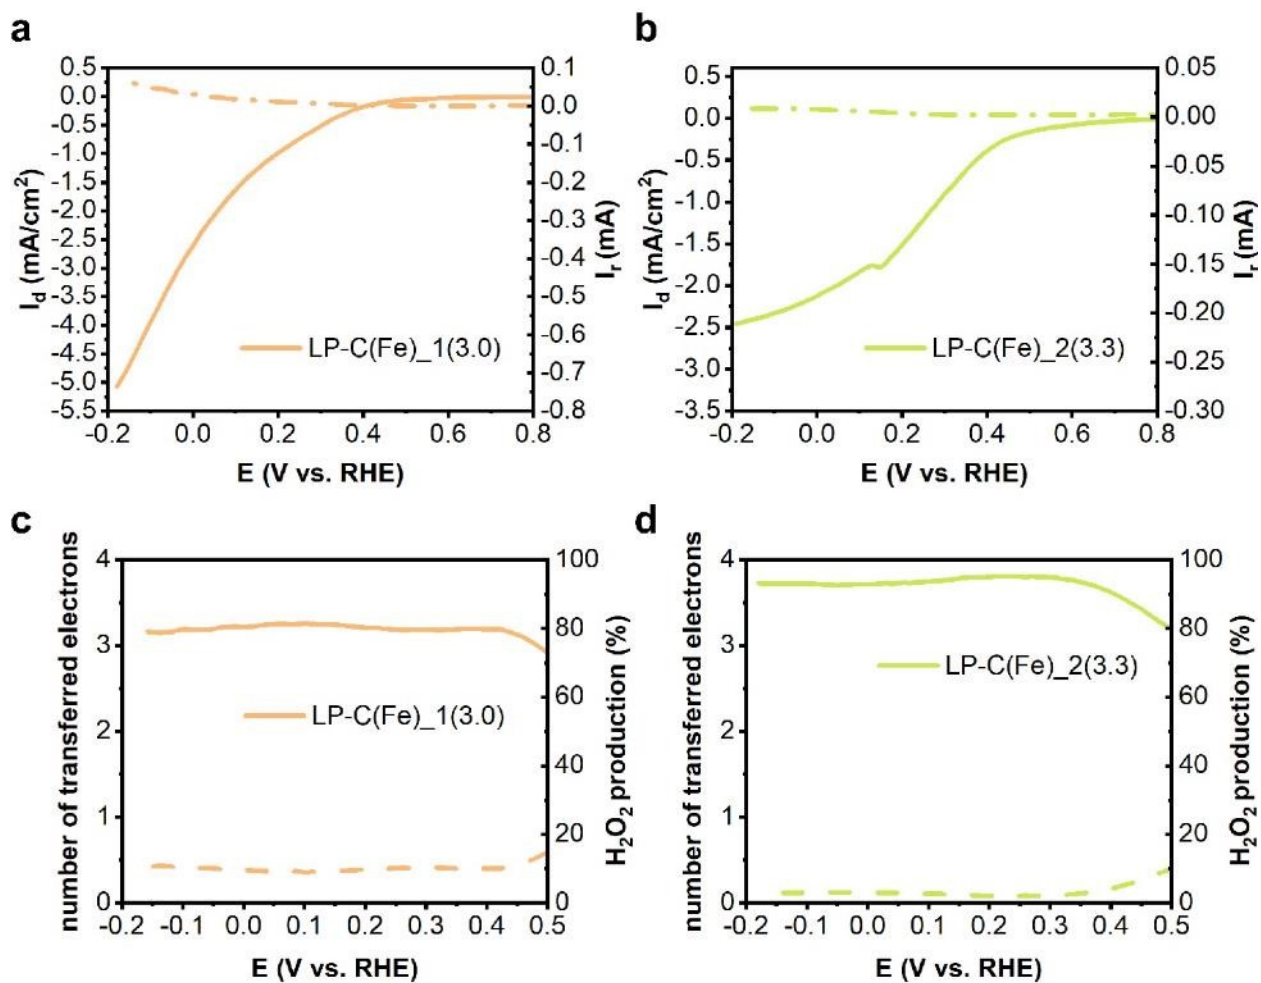

**Figure S13.** ORR performance in oxygen saturated 0.5M phosphate buffer (pH 7.2) evaluated using an RRDE setup. (a) and (b) Linear sweep voltammetry of LP-C(Fe)<sub>1</sub>(3.0) and LP-C(Fe)<sub>2</sub>(3.3), (c) and (d) Calculated number of transferred electrons and  $H_2O_2$  production efficiency of LP-C(Fe)<sub>1</sub>(3.0) and LP-C(Fe)<sub>2</sub>(3.3).  $H_2O_2$  ring current and selectivity (%) in dashed lines

## Comparison with published studies

**Table S4.** Overview of onset potentials and  $H_2O_2$  production efficiencies of previously published and our materials in alkaline electrolyte. The onset potential was calculated by the intercept with X-axes of the tangent to the LSV curve at E1/2. The values in Table S4 are either given in the text or estimated from the data given in each manuscript.

| Sample                                                                    | Fe type                                                                                           | Onset potential<br>(V vs. RHE) | Mechanism                             | max. $H_2O_2$<br>prod | Ref.      |
|---------------------------------------------------------------------------|---------------------------------------------------------------------------------------------------|--------------------------------|---------------------------------------|-----------------------|-----------|
| CA/U300                                                                   | -                                                                                                 | 0.73                           | 2 e <sup>-</sup>                      | 60                    | this work |
| LP-C(Fe)_2(3.3)                                                           | $\alpha$ -Fe <sub>2</sub> O <sub>3</sub> /FeO/Fe(0)@LP_C                                          | 0.77                           | 2 e <sup>-</sup>                      | 80                    | this work |
| LP-C(Fe)_2(14.5)                                                          | $\alpha$ -Fe <sub>2</sub> O <sub>3</sub> /FeO/Fe(0)@LP_C                                          | 0.72                           | 4 e <sup>-</sup>                      | 8                     | this work |
| Fe-CNT                                                                    | Fe-C-O                                                                                            | 0.82                           | 2 e <sup>-</sup>                      | 95                    | 1         |
| CG400                                                                     | -                                                                                                 | 0.72                           | 2 e <sup>-</sup>                      | 93                    | 2         |
| O-CNT                                                                     | -                                                                                                 | 0.73                           | 2 e <sup>-</sup>                      | 93                    | 3         |
| Fe <sub>3</sub> O <sub>4</sub> -graphene                                  | Fe <sub>3</sub> O <sub>4</sub> nanoparticles                                                      | 0.74                           | 2 e <sup>-</sup>                      | 80                    | 4         |
| CeO <sub>2</sub> /C                                                       | -                                                                                                 | 0.75                           | 2 e <sup>-</sup>                      | 44                    | 5         |
| SnNi/C                                                                    | -                                                                                                 | 0.70                           | 2 e <sup>-</sup>                      | 88                    | 6         |
| Fe <sub>3</sub> O <sub>4</sub> @NT                                        | Fe <sub>3</sub> O <sub>4</sub>                                                                    |                                | 2 e <sup>-</sup>                      |                       | 7         |
| NC@Fe <sub>2</sub> O <sub>3</sub> -CNT                                    | $\gamma$ -Fe <sub>2</sub> O <sub>3</sub> , Fe-N <sub>x</sub> , and Fe <sub>5</sub> C <sub>2</sub> | 0.96                           | 2 e <sup>-</sup>                      | 97.3                  | 8         |
| Fe <sub>2</sub> O <sub>3</sub>                                            | (001) Fe <sub>2</sub> O <sub>3-x</sub>                                                            | 0.73                           | 2 e <sup>-</sup>                      | 100                   | 9         |
| Fe <sub>2</sub> O <sub>3</sub>                                            | (012) Fe <sub>2</sub> O <sub>3-x</sub>                                                            | 0.84                           | -                                     | 10                    |           |
| $\alpha$ -Fe <sub>2</sub> O <sub>3</sub> /g-C <sub>3</sub> N <sub>4</sub> | $\alpha$ -Fe <sub>2</sub> O <sub>3</sub>                                                          |                                | 2 e <sup>-</sup> and 4 e <sup>-</sup> | 20                    | 10        |
| Fe <sub>3</sub> O <sub>4</sub> NP                                         | Fe <sub>3</sub> O <sub>4</sub>                                                                    | -0.6 V vs. SCE (pH 8.5)        | 2 e <sup>-</sup> and 4e <sup>-</sup>  | 50                    | 11        |
| $\gamma$ -Fe <sub>2</sub> O <sub>3</sub> /rGO                             | $\gamma$ -Fe <sub>2</sub> O <sub>3</sub>                                                          | 0.78                           | 2+2 e <sup>-</sup>                    | -                     | 12        |
| LP-C(Fe)_1(3.0)                                                           | $\eta$ -Fe <sub>2</sub> O <sub>3</sub> /Fe(0)                                                     | 0.77                           | 2 e <sup>-</sup> and 4 e <sup>-</sup> | 40                    | this work |
| LP-C(Fe)_1(12.1)                                                          | Fe <sub>3</sub> O <sub>4</sub>                                                                    | 0.80                           | 4 e <sup>-</sup>                      | 2                     | this work |
| Fe <sub>2</sub> O <sub>3</sub> /P-S-GC                                    | Fe <sub>2</sub> O <sub>3</sub>                                                                    | 0.97                           | 4 e <sup>-</sup>                      | -                     | 13        |
| $\alpha$ -Fe <sub>2</sub> O <sub>3</sub> @NT                              | $\alpha$ -Fe <sub>2</sub> O <sub>3</sub>                                                          |                                | 4 e <sup>-</sup>                      |                       | 7         |
| $\gamma$ -Fe <sub>2</sub> O <sub>3</sub> @CNF                             | $\gamma$ -Fe <sub>2</sub> O <sub>3</sub>                                                          | 0.92                           | 4 e <sup>-</sup>                      | -                     | 14        |
| Fe <sub>Sx</sub> /FeO <sub>Nx</sub> /NSC                                  | Fe-N <sub>4</sub> and Fe <sub>2</sub> O <sub>3</sub>                                              | 0.99                           | 4 e <sup>-</sup>                      | 15                    | 15        |
| Fe <sub>2</sub> O <sub>3</sub> /N-PCs-850                                 | Fe <sub>2</sub> O <sub>3</sub>                                                                    | 0.936                          | 4 e <sup>-</sup>                      | 5                     | 16        |
| Fe <sub>2</sub> O <sub>3</sub> /FeN <sub>x</sub> @CNF                     | Fe <sub>2</sub> O <sub>3</sub> and Fe-N                                                           | 1.10                           | 4 e <sup>-</sup>                      | 3                     | 17        |
| Fe <sub>2</sub> O <sub>3</sub> @CNF                                       | Fe <sub>2</sub> O <sub>3</sub>                                                                    | 1.06                           | 4 e <sup>-</sup>                      | 20                    |           |
| Fe-Fe <sub>2</sub> O <sub>3</sub> @NGr                                    | Fe(0), Fe <sub>2</sub> O <sub>3</sub> , and Fe-N                                                  | 0.075 V vs. Hg/HgO             |                                       | 13                    | 18        |
| Fe-Fe <sub>2</sub> O <sub>3</sub> @RGO                                    | Fe(0) and Fe <sub>2</sub> O <sub>3</sub>                                                          | -0.07 V vs. Hg/HgO             |                                       | 51.2                  |           |
| Fe <sub>2</sub> O <sub>3</sub> @Fe-N-C-800                                | Fe <sub>2</sub> O <sub>3</sub> and Fe-N                                                           | 1.02                           | 4 e <sup>-</sup>                      | -                     | 19        |
| Fe/Fe <sub>2</sub> O <sub>3</sub> /Fe <sub>3</sub> C@N-CNT                | Hollow particles<br>Fe/Fe <sub>2</sub> O <sub>3</sub> /Fe <sub>3</sub> C                          | 0.90                           | 4 e <sup>-</sup>                      | 2                     | 20        |
| Fe-CNSs-N                                                                 | $\alpha$ -Fe <sub>2</sub> O <sub>3</sub> and Fe <sub>3</sub> O <sub>4</sub>                       | 0.90                           | 4 e <sup>-</sup>                      | -                     | 21        |
| FeN <sub>x</sub> /Fe <sub>2</sub> O <sub>3</sub> -CNF                     | $\gamma$ -Fe <sub>2</sub> O <sub>3</sub> and Fe-N                                                 | 0.87                           | 4 e <sup>-</sup>                      | 6                     | 22        |
| Fe <sub>2</sub> O <sub>3</sub> /N-bio-C                                   | Fe <sub>2</sub> O <sub>3</sub>                                                                    | 0.90                           | hybrid                                | -                     | 23        |
| Fe and N co-doped C                                                       | Fe-N-C                                                                                            | 0.51 (neutral pH)              | 4 e <sup>-</sup>                      | -                     | 24        |
| OMCS-Fe <sub>2</sub> O <sub>3</sub>                                       |                                                                                                   | 0.804                          | 4 e <sup>-</sup>                      | -                     | 25        |
| Fe <sub>2</sub> O <sub>3</sub> @NC-800                                    | $\gamma$ -Fe <sub>2</sub> O <sub>3</sub>                                                          | 0.97                           | 4 e <sup>-</sup>                      | 1.20                  | 26        |
| Fe <sub>3</sub> O <sub>4</sub> - GO                                       | Fe <sub>3</sub> O <sub>4</sub>                                                                    |                                | 4 e <sup>-</sup>                      | -                     | 27        |
| Fe <sub>2</sub> O <sub>3</sub> /GO                                        | Fe <sub>2</sub> O <sub>3</sub>                                                                    | 0.85                           | 2+2e <sup>-</sup>                     | -                     | 28        |
| Fe/N-CNTs                                                                 | Fe-N                                                                                              | 0.862                          | 4 e <sup>-</sup>                      |                       | 29        |
| P-Fe-C-900                                                                | P-Fe-C                                                                                            | 0.825                          | 4 e <sup>-</sup>                      | 15                    | 30        |
| Hemin/NPC-900                                                             | Fe-N-C                                                                                            | 0.99                           | 4 e <sup>-</sup>                      | -                     | 31        |
| Fe@N/HCS                                                                  | Fe <sub>3</sub> O <sub>4</sub>                                                                    | 0.90                           | 4 e <sup>-</sup>                      | 15                    | 32        |
| Fe <sub>3</sub> O <sub>4</sub> @NHCS                                      | Fe <sub>3</sub> O <sub>4</sub>                                                                    | 0.9                            | 4 e <sup>-</sup>                      | -                     | 33        |
| Fe <sub>3</sub> O <sub>4</sub> /Fe <sub>3</sub> C@NC-1                    | Fe <sub>3</sub> O <sub>4</sub> and Fe <sub>3</sub> C                                              | 0.97                           | 4 e <sup>-</sup>                      | 10                    | 34        |
| Fe <sub>3</sub> O <sub>4</sub> NPs/NGC                                    | Fe <sub>3</sub> O <sub>4</sub>                                                                    | 1.015                          | 4 e <sup>-</sup>                      | 9                     | 35        |
| COP@K10-Fe-900                                                            | Fe <sub>3</sub> O <sub>4</sub> and Fe-N-C                                                         | 0.97                           | 4 e <sup>-</sup>                      | 10                    | 36        |
| Fe <sub>3</sub> O <sub>4</sub> @NGA                                       | Fe <sub>3</sub> O <sub>4</sub>                                                                    | 0.92                           | 4 e <sup>-</sup>                      | -                     | 37        |
| Fe <sub>3</sub> O <sub>4</sub> /FeNSG-3                                   | Fe-N-C and Fe <sub>3</sub> O <sub>4</sub>                                                         | 0.951                          | 4 e <sup>-</sup>                      | 6                     | 38        |
| C-FePPDA-900                                                              | Fe <sub>3</sub> O <sub>4</sub> with o-vacancies<br>on n-doped carbon                              | 0.87                           | 4 e <sup>-</sup>                      | 7.5                   | 39        |
| Fe <sub>3</sub> O <sub>4</sub> @FeNC                                      | Fe <sub>3</sub> O <sub>4</sub> and Fe-N                                                           |                                | 4 e <sup>-</sup>                      | 2                     | 40        |
| Fe <sub>3</sub> O <sub>4</sub> /NCMTs-800(IL)                             | Fe <sub>3</sub> O <sub>4</sub>                                                                    | 0.794                          | 4 e <sup>-</sup>                      | -                     | 41        |

## References

- 1 K. Jiang, S. Back, A. J. Akey, C. Xia, Y. Hu, W. Liang, D. Schaak, E. Stavitski, J. K. Nørskov, S. Siahrostami and H. Wang, *Nat. Commun.*, 2019, **10**, 3997.
- 2 Y.-H. Lee, F. Li, K.-H. Chang, C.-C. Hu and T. Ohsaka, *Appl. Catal. B Environ.*, 2012, **126**, 208–214.
- 3 Z. Lu, G. Chen, S. Siahrostami, Z. Chen, K. Liu, J. Xie, L. Liao, T. Wu, Di. Lin, Y. Liu, T. F. Jaramillo, J. K. Nørskov and Y. Cui, *Nat. Catal.*, 2018, **1**, 156–162.
- 4 W. R. P. Barros, Q. Wei, G. Zhang, S. Sun, M. R. V Lanza and A. C. Tavares, *Electrochim. Acta*, 2015, **162**, 263–270.
- 5 M. H. M. T. Assumpção, A. Moraes, R. F. B. De Souza, I. Gaubeur, R. T. S. Oliveira, V. S. Antonin, G. R. P. Malpass, R. S. Rocha, M. L. Calegari, M. R. V Lanza and M. C. Santos, *Appl. Catal. A Gen.*, 2012, **411–412**, 1–6.
- 6 V. S. Antonin, M. H. M. T. Assumpção, J. C. M. Silva, L. S. Parreira, M. R. V Lanza and M. C. Santos, *Electrochim. Acta*, 2013, **109**, 245–251.
- 7 Y. Xue, W. Jin, H. Du, S. Wang, S. Zheng and Y. Zhang, *RSC Adv.*, 2016, **6**, 41878–41884.
- 8 X. Cheng, S. Dou, G. Qin, B. Wang, P. Yan, T. T. Isimjan and X. Yang, *Int. J. Hydrogen Energy*, 2020, **45**, 6128–6137.
- 9 R. Gao, L. Pan, Z. Li, C. Shi, Y. Yao, X. Zhang and J.-J. Zou, *Adv. Funct. Mater.*, 2020, **30**, 1910539.
- 10 S. Dutta, T. K. Jana, R. Maiti, K. De and K. Chatterjee, *ChemistrySelect*, 2021, **6**, 11759–11767.
- 11 Y. Xiao, J. Hong, X. Wang, T. Chen, T. Hyeon and W. Xu, *J. Am. Chem. Soc.*, 2020, **142**, 13201–13209.
- 12 Q. Feng, Z. Chen, K. Zhou, M. Sun, X. Ji, H. Zheng and Y. Zhang, *ChemistrySelect*, 2021, **6**, 8177–8181.
- 13 H. Zhao, J. Wang, C. Chen, D. Chen, Y. Gao, M. Saccoccio and F. Ciucci, *RSC Adv.*, 2016, **6**, 64258–64265.
- 14 Z. Yao, Y. Li, D. Chen, Y. Zhang, X. Bao, J. Wang and Q. Zhong, *Chem. Eng. J.*, 2021, **415**, 129033.
- 15 Y. Lei, F. Yang, H. Xie, Y. Lei, X. Liu, Y. Si and H. Wang, *J. Mater. Chem. A*, 2020, **8**, 20629–20636.
- 16 T. Zhang, L. Guan, C. Li, J. Zhao, M. Wang, L. Peng, J. Wang and Y. Lin, *Catalysts*, 2018, **8**, 101.
- 17 M. Wang, T. Liao, X. Zhang, J. Cao, S. Xu, H. Tang and Y. Wang, *Adv. Mater. Interfaces*, 2022, **9**, 2101904.
- 18 V. M. Dhavale, S. K. Singh, A. Nadeema, S. S. Gaikwad and S. Kurungot, *Nanoscale*, 2015, **7**, 20117–20125.
- 19 X. Xu, C. Shi, Q. Li, R. Chen and T. Chen, *RSC Adv.*, 2017, **7**, 14382–14388.
- 20 B. Zhang, T. Li, L. Huang, Y. Ren, D. Sun, H. Pang, J. Yang, L. Xu and Y. Tang, *Nanoscale*, 2021, **13**, 5400–5409.
- 21 Y. Wang, R. Gan, H. Liu, M. Dirican, C. Wei, C. Ma, J. Shi and X. Zhang, *J. Mater. Chem. A*, 2021, **9**, 2764–2774.
- 22 Q. Yu, S. Lian, J. Li, R. Yu, S. Xi, J. Wu, D. Zhao, L. Mai and L. Zhou, *J. Mater. Chem. A*, 2020, **8**, 6076–6082.
- 23 Y. Wu, H. Jiao, M. Hou and P. Zhang, *J. Phys. Conf. Ser.*, 2021, **2079**, 12002.
- 24 Y. Su, H. Jiang, Y. Zhu, W. Zou, X. Yang, J. Chen and C. Li, *J. Power Sources*, 2014, **265**, 246–253.
- 25 J. He, B. Li, J. Mao, Y. Liang, X. Yang, Z. Cui, S. Zhu and Z. Li, *J. Mater. Sci.*, 2017, **52**, 10938–10947.
- 26 Z. Xiao, G. Shen, F. Hou, R. Zhang, Y. Li, G. Yuan, L. Pan, J. J. Zou, L. Wang, X. Zhang and G. Li, *Catal. Sci. Technol.*, 2019, **9**, 4581–4587.
- 27 K. Lellala, *Energy & Fuels*, 2021, **35**, 8263–8274.
- 28 S. Arya Gopal, A. Edathiparambil Poullose, C. Sudakar and A. Muthukrishnan, *ACS Appl. Mater. Interfaces*, 2021, **13**, 44195–44206.
- 29 W. Liu, K. Yuan, Q. Ru, S. Zuo, L. Wang, S. Yang, J. Han and C. Yao, *Arab. J. Chem.*, 2020, **13**, 4954–4965.
- 30 Z. Yang, J. Wu, X. Zheng, Z. Wang and R. Yang, *J. Power Sources*, 2015, **277**, 161–168.
- 31 Z. Lu, J. Chen, W. Wang, W. Li, M. Sun, Y. Wang, X. Wang, J. Ye and H. Rao, *Small*, 2021, **17**, 2007326.

- 32 B. Wang, Y. Ye, L. Xu, Y. Quan, W. Wei, W. Zhu, H. Li and J. Xia, *Adv. Funct. Mater.*, 2020, **30**, 2005834.
- 33 Y. Li, H. Huang, S. Chen, X. Yu, C. Wang and T. Ma, *Nano Res.*, 2019, **12**, 2774–2780.
- 34 M. Liu, X. Guo, L. Hu, H. Yuan, G. Wang, B. Dai, L. Zhang and F. Yu, *ChemNanoMat*, 2019, **5**, 187–193.
- 35 Y. Chen, L. Li, X. Liu, W. Wan and J. Luo, *Mater. Res. Express*, 2019, **6**, 65019.
- 36 J. Guo, Y. Cheng and Z. Xiang, *ACS Sustain. Chem. Eng.*, 2017, **5**, 7871–7877.
- 37 Z. Liang, W. Xia, C. Qu, B. Qiu, H. Tabassum, S. Gao and R. Zou, *ChemElectroChem*, 2017, **4**, 2442–2447.
- 38 Y. Li, Y. Zhou, C. Zhu, Y. H. Hu, S. Gao, Q. Liu, X. Cheng, L. Zhang, J. Yang and Y. Lin, *Catal. Sci. Technol.*, 2018, **8**, 5325–5333.
- 39 Y. Deng, X. Tian, G. Shen, Y. Gao, C. Lin, L. Ling, F. Cheng, S. Liao and S. Zhang, *J. Colloid Interface Sci.*, 2020, **567**, 410–418.
- 40 S. Hu, W. Ni, D. Yang, C. Ma, J. Zhang, J. Duan, Y. Gao and S. Zhang, *Carbon N. Y.*, 2020, **162**, 245–255.
- 41 G. Liu, B. Wang, P. Ding, Y. Ye, W. Wei, W. Zhu, L. Xu, J. Xia and H. Li, *J. Alloys Compd.*, 2019, **797**, 849–858.
